# Supplementary material for: Function Annotation of an SBP-box Gene in Arabidopsis Based on Analysis of Co-expression Networks and Promoters
Source: MDPI journal article supplement (doi:10.3390/ijms10010116), 2009-01-02
Supplement: s1 [file s1]

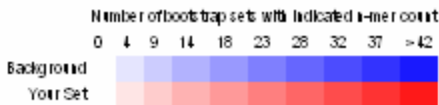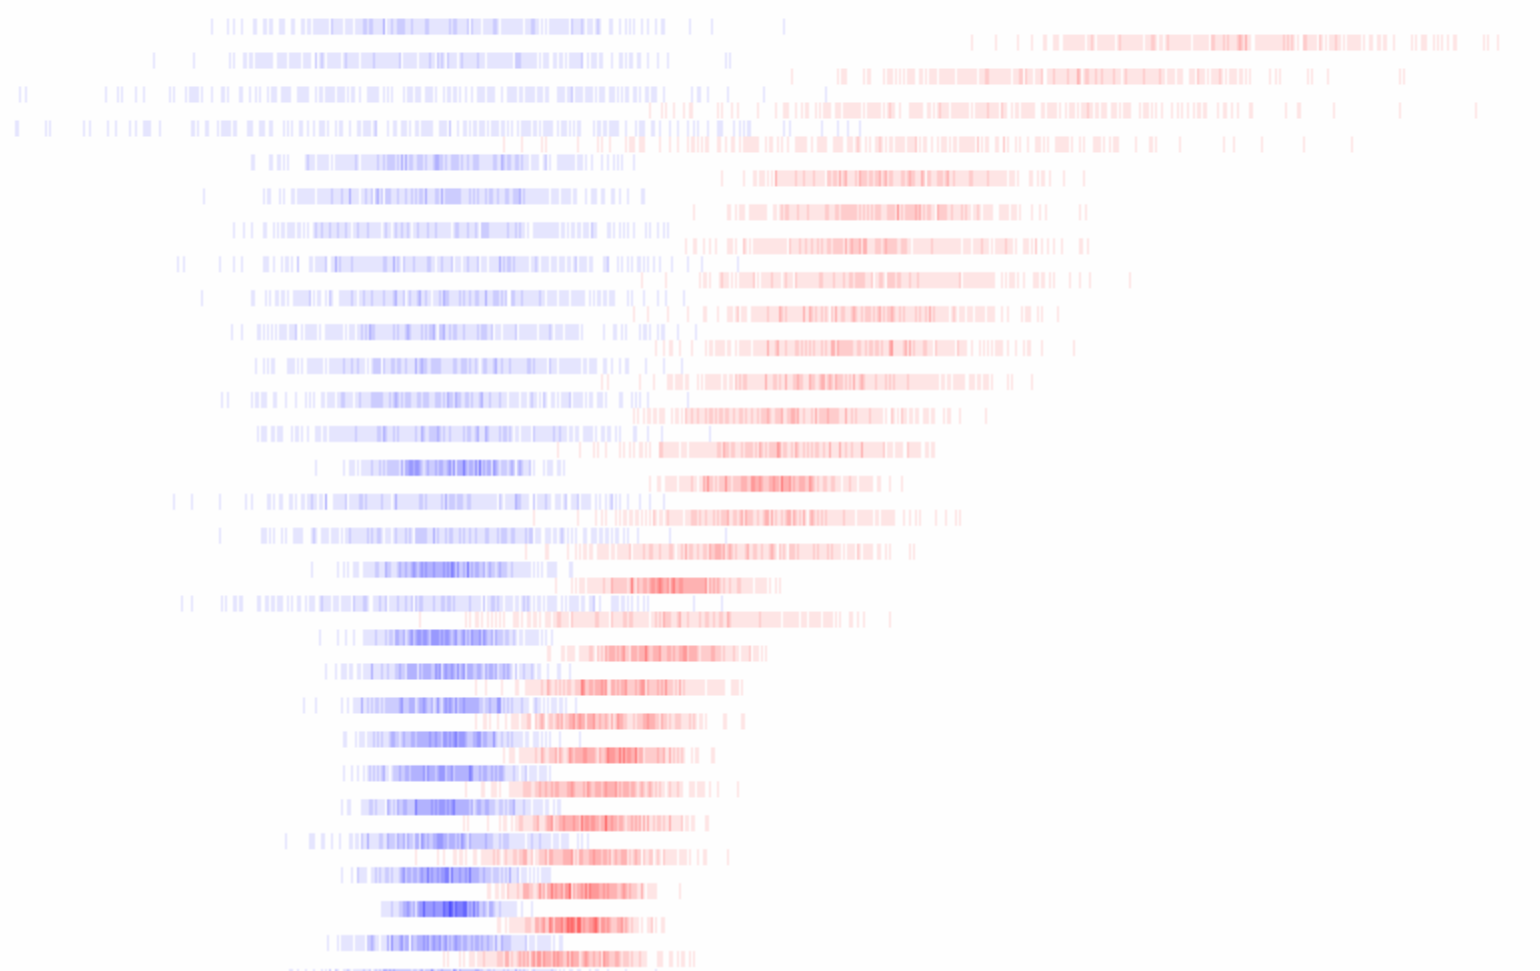

|      | k-mer           | Big Ave | SetAve | Z-score, Significance |
|------|-----------------|---------|--------|-----------------------|
| TATA |                 |         |        |                       |
| ATAT | 1. <u>TATA</u>  | 1034.2  | 1423.2 | 6.0, 0.001            |
| TTTT | 2. <u>ATAT</u>  | 1189.7  | 1505.0 | 4.4, 0.001            |
| AAAA | 3. <u>TTTT</u>  | 2193.8  | 2462.1 | 2.3, 0.05             |
| ATTA | 4. <u>AAAA</u>  | 2408.2  | 2631.6 | 1.8, 0.05             |
| TAAT | 5. <u>ATTA</u>  | 971.3   | 1194.3 | 4.6, 0.001            |
| TAAT | 6. <u>TAAT</u>  | 991.9   | 1208.9 | 4.3, 0.001            |
| AATA | 7. <u>AATA</u>  | 1105.3  | 1322.0 | 3.7, 0.001            |
| AATA | 8. <u>AAAT</u>  | 1496.2  | 1711.6 | 3.2, 0.001            |
| AAAT | 9. <u>ATAA</u>  | 1099.4  | 1307.0 | 3.8, 0.001            |
| ATAA | 10. <u>TAAA</u> | 1289.4  | 1490.3 | 3.3, 0.001            |
| TAAA | 11. <u>TATT</u> | 1086.3  | 1276.8 | 3.5, 0.001            |
| TAAA | 12. <u>TTAT</u> | 1052.4  | 1223.0 | 3.3, 0.001            |
| TATT | 13. <u>TTAA</u> | 1071.0  | 1238.9 | 3.2, 0.001            |
| TTAT | 14. <u>TACA</u> | 513.9   | 674.3  | 5.8, 0.001            |
| TTRA | 15. <u>TTTA</u> | 1214.0  | 1370.4 | 2.7, 0.005            |
| TACA | 16. <u>AATT</u> | 1264.9  | 1408.3 | 2.6, 0.005            |
| TTTA | 17. <u>TGTA</u> | 508.4   | 621.2  | 4.2, 0.001            |
| AATT | 18. <u>ATTT</u> | 1468.3  | 1579.7 | 1.7, 0.05             |
| TGTA | 19. <u>ATAC</u> | 423.6   | 530.5  | 4.4, 0.001            |
| ATTT | 20. <u>ATGT</u> | 597.9   | 684.7  | 3.0, 0.005            |
| ATAC | 21. <u>AATG</u> | 626.5   | 706.7  | 2.8, 0.005            |
| ATGT | 22. <u>GAT</u>  | 432.1   | 511.9  | 3.3, 0.001            |
| AATG | 23. <u>TAGT</u> | 467.4   | 542.1  | 3.0, 0.005            |
| GAT  | 24. <u>TTAC</u> | 485.7   | 560.1  | 2.9, 0.005            |
| TAGT | 25. <u>ACAT</u> | 646.5   | 713.4  | 2.1, 0.05             |
| TTAC | 26. <u>AGTA</u> | 445.5   | 511.7  | 2.7, 0.005            |
| ACAT | 27. <u>GTAC</u> | 202.1   | 267.5  | 4.1, 0.001            |
| AGTA | 28. <u>TATG</u> | 516.5   | 575.4  | 2.1, 0.05             |
| GTAC | 29. <u>TTTC</u> | 916.0   | 971.0  | 1.4                   |
| TATG | 30. <u>TTCA</u> | 734.6   | 789.5  | 1.8, 0.05             |
